# Supplementary material
Source: PubMed Central journal article supplement (PMC8117172)

## Supplemental Material

**Supplemental Table 1.** PCT and NCT infarct volume in different time windows in comparison with DWI\* results derived from Dr. González study.

|        | No. | PCT infarct volume(ml) |       |        |     | NCT infarct volume(ml) |       |        |     | DWI* volume |       |        |     |
|--------|-----|------------------------|-------|--------|-----|------------------------|-------|--------|-----|-------------|-------|--------|-----|
|        |     | mean                   | Range | Median | IQR | mean                   | Range | Median | IQR | mean        | Range | Median | IQR |
| 0~3h   | 142 | 73                     | 276   | 54     | 81  | 37                     | 182   | 28     | 44  | 65          | 276   | 23     | 97  |
| 3~6h   | 46  | 87                     | 187   | 63     | 111 | 48                     | 187   | 41     | 58  | 62          | 308   | 41     | 80  |
| 6~9h   | 21  | 83                     | 185   | 59     | 94  | 51                     | 167   | 34     | 77  | 60          | 318   | 30     | 56  |
| 9~12h  | 9   | 64                     | 151   | 73     | 88  | 66                     | 116   | 65     | 61  | 69          | 219   | 43     | 68  |
| 12~15h | 5   | 87                     | 211   | 75     | 50  | 79                     | 303   | 25     | 47  | 43          | 128   | 13     | 96  |
| 15~18h | 5   | 59                     | 160   | 26     | 72  | 40                     | 95    | 20     | 40  | 53          | 135   | 62     | 63  |
| >18h   | 4   | 38                     | 114   | 19     | 53  | 86                     | 287   | 28     | 89  | 53          | 237   | 15     | 64  |

DWI\* is the results from R. Gilberto González study

**Supplemental Table 2:** univariate analysis for the prediction of PCT IGR, NCT IGR, and mRS

| Clinical and imaging biomarkers              | Biomarkers for prediction |                      |                       |                       |                        |                   |
|----------------------------------------------|---------------------------|----------------------|-----------------------|-----------------------|------------------------|-------------------|
|                                              | PCT IGR                   |                      | NCT IGR               |                       | mRS                    |                   |
|                                              | <11.2<br>ml/log(min)      | >11.2ml/log<br>(min) | <6.2ml/log<br>(min)   | <6.2ml/log(<br>min))  | <=2                    | >2                |
| Clinical biomarkers                          |                           |                      |                       |                       |                        |                   |
| Age in years (median [IQR])                  | 70.5[60,77]               | 68.5[57.3,79]        | 70[59.3,78]           | 69[58, 78]            | 68[54.0, 76]*          | 72[59.5, 72.0]*   |
| Female (%)                                   | 53(22.8)                  | 58(25)               | 57(24.5)              | 54(23.3)              | 43(18.5)               | 68(29.3)          |
| Hypertension (%)                             | 70(30.2)                  | 67(28.9)             | 67(28.9)              | 70(30.2)              | 55(23.7)               | 82(35.3)          |
| Diabetes mellitus (%)                        | 18(7.8)                   | 26(11.2)             | 21(9.1)               | 23(9.9)               | 22(9.5)                | 22(9.5)           |
| Glucose (mg/dL) (median [IQR])               | 6.6[5.9,7.8]              | 6.8[5.9,7.9]         | 6.6[5.9,7.7]          | 6.7[6, 8.1]           | 6.8[4, 7.9]            | 6.6[5.9, 7.8]     |
| Hyperlipidemia (%)                           | 86(37.1)                  | 74(31.9)             | 82(35.4)              | 78(33.6)              | 58(25.0)               | 102(44.0)         |
| Statin use (%)                               | 29(12.5)                  | 28(12.1)             | 26(11.2)              | 31(13.4)              | 21(9.1)                | 36(15.5)          |
| Atrial fibrillation (%)                      | 46(19.8)                  | 56(24.1)             | 52(22.4)              | 50(21.6)              | 38(16.4)               | 64(27.6)          |
| Cardiovascular (%)                           | 14(6.0)                   | 12(5.2)              | 14(6.0)               | 12(5.2)               | 10(4.3)                | 16(6.9)           |
| Smoking status (%)                           |                           |                      |                       |                       |                        |                   |
| never smoked                                 | 64(27.6)*                 | 75(32.3)*            | 75(32.3)*             | 64(27.6)*             | 56(24.1)               | 83(35.8)          |
| active smoker or stopped < 2<br>years ago    | 30(12.9)*                 | 32(13.8)*            | 22(9.5)*              | 40(17.2)*             | 24(10.3)               | 38(16.4)          |
| stopped smoking >2 years ago                 | 22(9.5)*                  | 9(3.9)*              | 19(8.2)*              | 12(5.2)*              | 11(4.7)                | 20(8.6)           |
| NIHSS                                        | 17.5(13.25,21)<br>*       | 16(11,21)*           | 15(10.25,20)*         | 18.5(14,22)*          | 13(7,17)*              | 15.5(20,22)*      |
| Imaging biomarkers                           |                           |                      |                       |                       |                        |                   |
| Time from symptom onset(h)<br>(median [IQR]) | 2.3[1.5, 4.6]             | 2.5[1.8, 4.5]        | 2.2[1.5, 3.4]         | 2.9[1.8, 5.7]         | 2.3[1.6, 4.5]          | 2.5[1.8, 4.6]     |
| ASPECT score (median [IQR])                  | 7[6, 8.8]*                | 6[5, 7]*             | -                     | -                     | -                      | -                 |
| NCT infarct volume (ml) (median<br>[IQR])    | -                         | -                    | -                     | -                     | 23.4[11.6,45.8]        | 36.8[12.8,76.1]   |
| PCT infarct volume (ml) (median<br>[IQR])    | -                         | -                    | -                     | -                     | 37.9[15.6,72.6]        | 82.8[39.5,145.2]  |
| Penumbra volume(ml) (median<br>[IQR])        | 138.8[110.0,17<br>1.8]*   | 96.5[57.7,127.6]*    | 121.7[90.9,163.3<br>] | 114.5[71.3,15<br>2.7] | 128.4[96.4,165.3]<br>* | 112[67.6, 152.6]* |
| Occlusion site (%)                           |                           |                      |                       |                       |                        |                   |
| ICA and M1 and M2                            | 14(6.0)*                  | 41(17.7)*            | 13(5.6)*              | 42(18.1)*             | 15(6.5)*               | 40(17.2)*         |
| ICA and M1                                   | 8(3.4)*                   | 17(7.3)*             | 10(4.3)*              | 15(6.5)*              | 6(2.6)*                | 19(8.2)*          |
| M1 and M2                                    | 60(25.9)*                 | 44(19.0)*            | 61(26.3)*             | 43(18.5)*             | 48(20.7)*              | 56(24.1)*         |
| M1 only                                      | 34(14.7)*                 | 14(6.0)*             | 32(13.8)*             | 16(6.9)*              | 22(9.5)*               | 26(11.2)*         |

|                                   |          |          |           |           |          |          |
|-----------------------------------|----------|----------|-----------|-----------|----------|----------|
| Collateral (%)                    |          |          |           |           |          |          |
| absent collaterals                | 11(4.7)  | 15(6.5)  | 8(3.4)*   | 18(7.8)*  | 5(2.2)   | 21(9.1)  |
| < 50% of occluded territory       | 44(19.0) | 58(25.0) | 44(19.0)* | 58(25.0)* | 40(17.2) | 62(26.7) |
| 50%≤ and <100% occluded territory | 39(16.8) | 33(14.2) | 43(18.5)* | 29(12.5)* | 30(12.9) | 42(18.1) |
| 100% of occluded territory        | 22(9.5)  | 10(4.3)  | 21(9.1)*  | 11(4.7)*  | 16(6.9)  | 16(6.9)  |
| Recanalization (%)                | -        | -        | -         | -         | 58(25)   | 88(37.9) |

**Supplemental Table 3.** Distribution 3-month mRS score in our study patients.

| Modified Rankin Scale | N (%)          |
|-----------------------|----------------|
| mRS=0                 | 16 /232(6.9)   |
| mRS=1                 | 28 /232 (12.1) |
| mRS=2                 | 47/232 (20.3)  |
| mRS=3                 | 35/232 (15.1)  |
| mRS=4                 | 41 /232 (17.7) |
| mRS=5                 | 15 /232 (6.5)  |
| mRS=6                 | 50 /232 (21.6) |

**Supplemental Figure I.** Patient inclusion decision tree for our study.

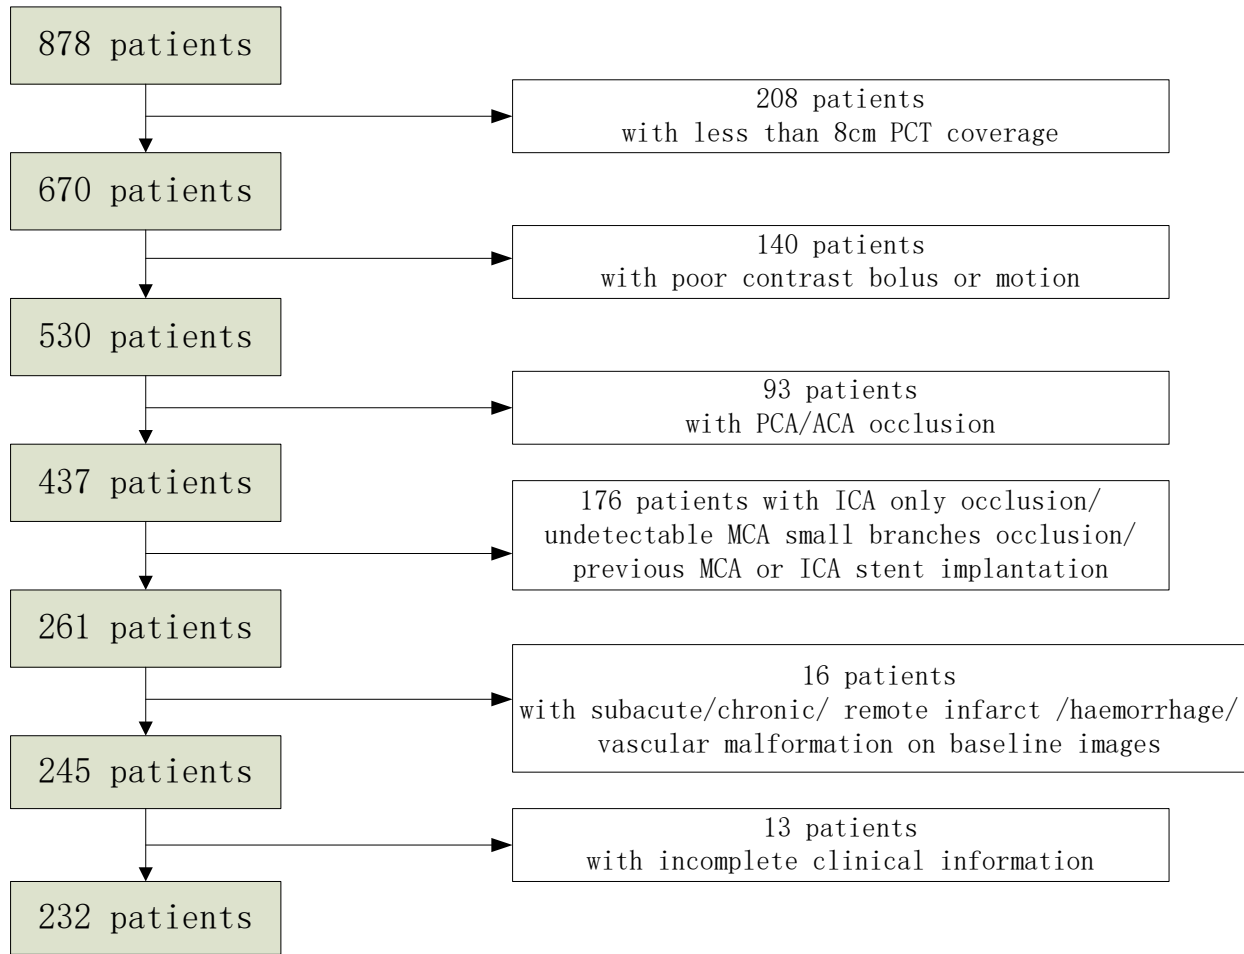

Supplement: NIHMS1680443-supplement-Supplementary_Information.pdf [file NIHMS1680443-supplement-Supplementary_Information.pdf]
